# Supplementary material for: Carbon fibers/ZnO nanowires hybrid nanogenerator based on an insulating interface barrier
Source: Royal Society of Chemistry journal article supplement (doi:10.1039/c7ra02491f), 2017-01-01
Supplement: c7ra02491f1.pdf [file c7ra02491f1.pdf]

## Supporting Information

Carbon fibers/ZnO nanowires hybrid nanogenerator based on  
insulating interface barrier

Yunzhe Du, Chuankai Fu, Yunzhi Gao, Li Liu\*, Yawei Liu, Lixin Xing and Feng Zhao

School of Chemistry and Chemical Engineering, Harbin Institute of Technology, Harbin,  
Heilongjiang, 150001, China

---

\* Corresponding author  
E-mail: liuli@hit.edu.cn.

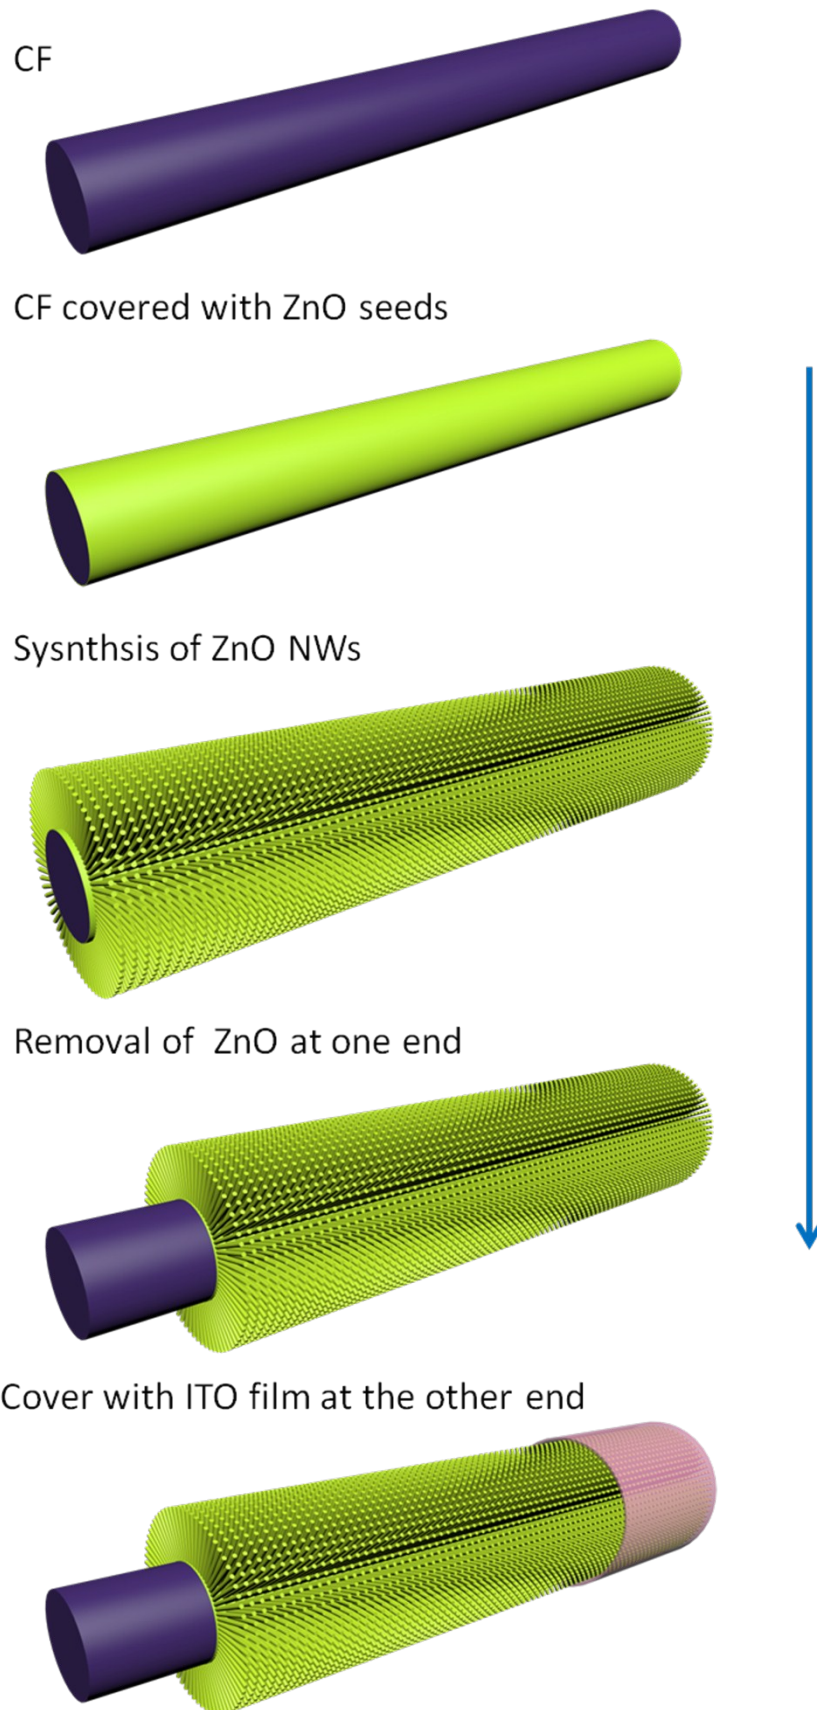

**Fig. S1** schematic presents fabrication process of as designed CFs/ZnO NWs hybrid NG.

X-ray diffraction (XRD) measurement demonstrated the crystalline structures of CFs and ZnO NWs. The broad peak at around  $25^\circ$  was attributed to the CFs (002) planes. And the rest peaks could be indexed to hexagonal wurtzite structure of ZnO NWs. Three peaks at  $31.8^\circ$ ,  $34.4^\circ$  and  $36.3^\circ$  corresponded to the (100), (002) and (101) planes of ZnO NWs respectively.

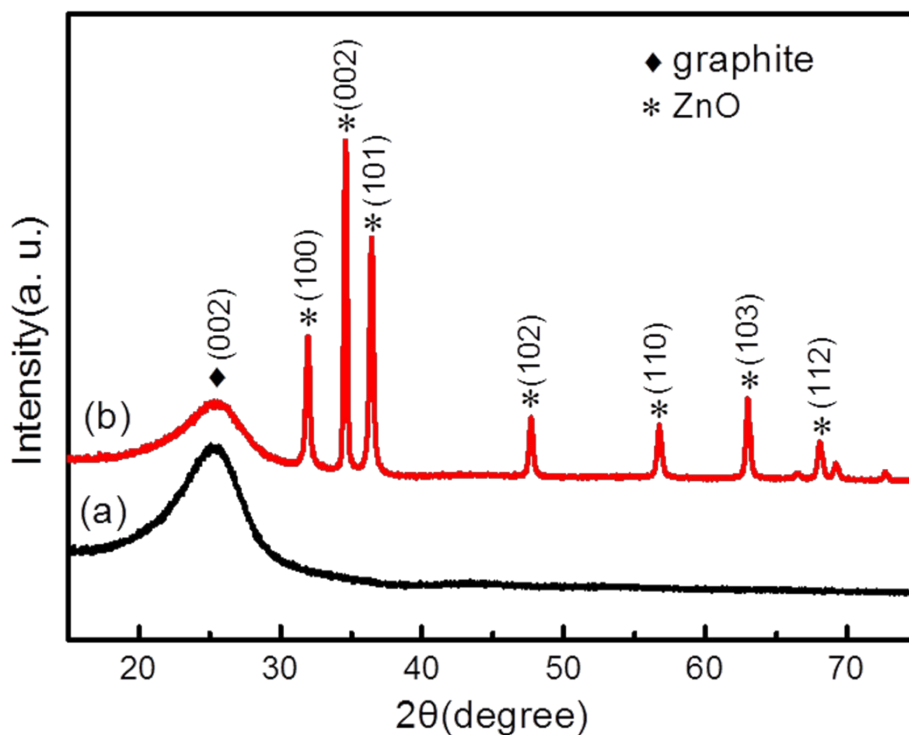

**Fig. S2** XRD patterns of CFs (a) and CFs covered with ZnO NWs (b).

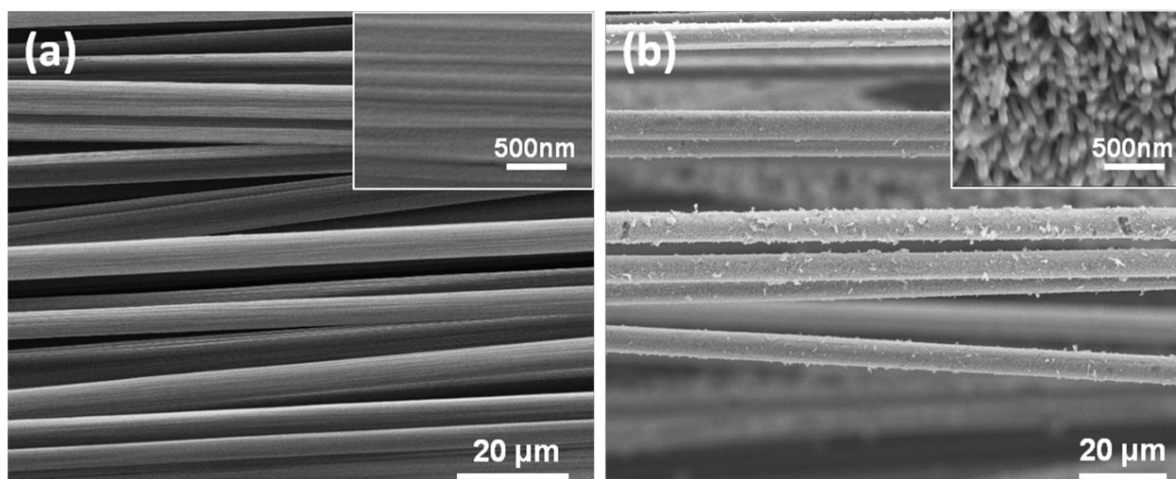

**Fig. S3** SEM images of bare CFs (a) and CFs covered with ZnO NWs at different magnification.

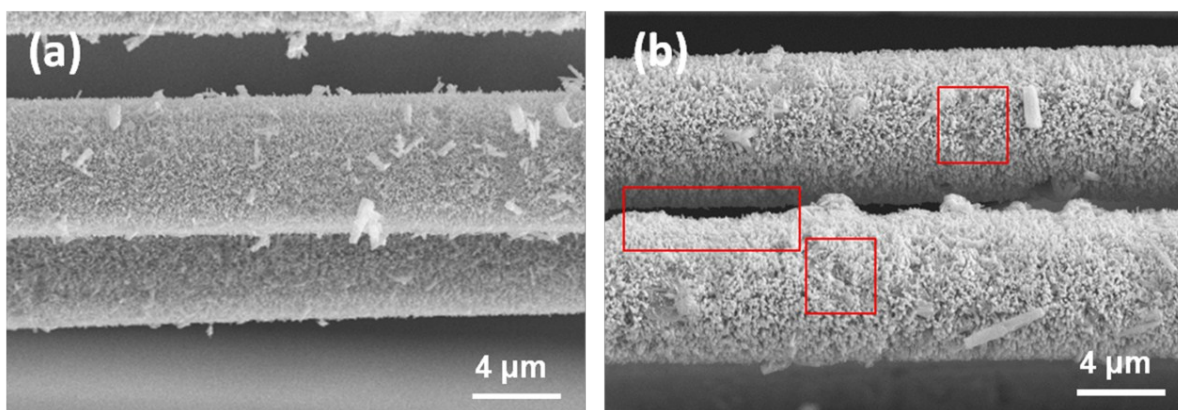

**Fig. S4** SEM images of CFs covered with ZnO NWs before and after electrochemical tests of 20min.

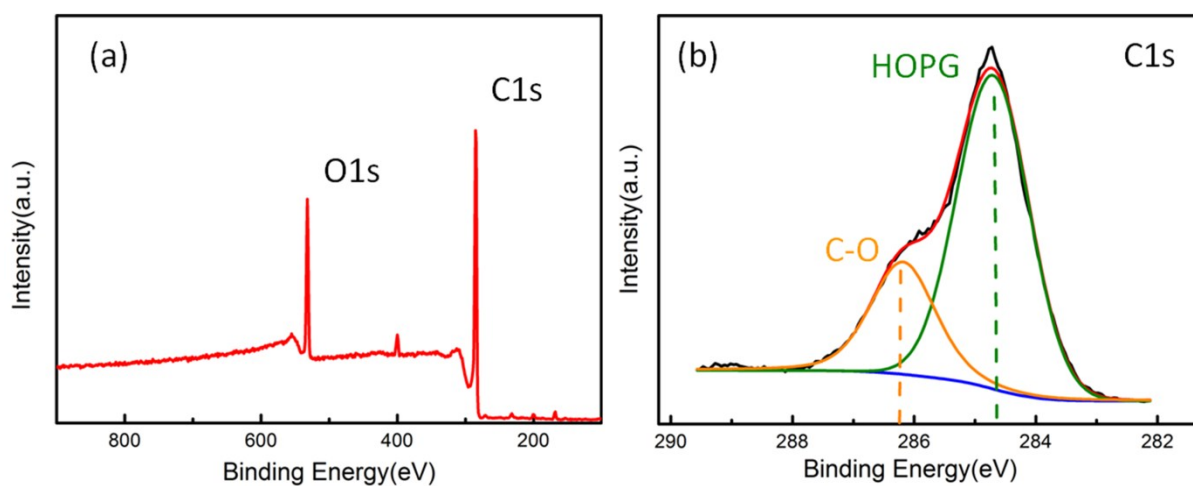

**Fig. S5** XPS survey spectra and C1s high-resolution spectra of untreated CFs.

**Table S1** Surface element analysis, and bonding states peaks locations and contents of the decomposed C1s energy states of untreated CFs.

| Element          | C     | O     | Functional Groups | C-O (286.5eV) | HOPG (284.6eV) |
|------------------|-------|-------|-------------------|---------------|----------------|
| Atomic Ratio (%) | 61.33 | 38.67 | Content (%)       | 28.09         | 71.91          |
